# Supplementary material
Source: publisher site journal article supplement (https://www.spandidos-publications.com/3717/downloadSupplementary)
Supplement: Supplementary file 1 [file downloadSupplementary]

## Sheet: Table SⅥ
Table SVI. All common differentially expressed genes between GSE7084 and GSE57691.
Symbol	GSE7084			GSE57691
	log2FC	P-value	Group	log2FC	P-value	Group
MMP9	4.02	9.81X10-5	UP	2.05	3.92X10-4	UP
FOSB	3.79	1.22X10-5	UP	3.52	5.16X10-10	UP
IL8	3.22	1.99X10-4	UP	2.72	9.49X10-7	UP
CCL3L1	3.2	2.44X10-7	UP	1.59	9.02X10-4	UP
CD83	3.08	2.00X10-8	UP	2.15	5.48X10-7	UP
LTB	3.08	6.77X10-5	UP	2.88	3.31X10-9	UP
FCN1	2.97	1.04X10-4	UP	2.52	1.59X10-11	UP
CCL3	2.87	1.26X10-8	UP	1.6	4.95X10-4	UP
IL1B	2.86	1.42X10-5	UP	3.28	5.12X10-10	UP
MMP25	2.77	1.11X10-6	UP	1.5	4.18X10-5	UP
CD37	2.73	5.38X10-5	UP	2.13	4.00X10-6	UP
RUNX3	2.73	3.17X10-8	UP	1.74	1.31X10-7	UP
MMP12	2.7	1.13X10-3	UP	1.8	2.23X10-2	UP
HLA-DQA1	2.69	2.08X10-2	UP	1.73	4.21X10-5	UP
MZB1	2.68	9.38X10-3	UP	2.53	8.91X10-5	UP
IGJ	2.65	7.53X10-3	UP	1.96	5.83X10-3	UP
UCP2	2.61	6.59X10-6	UP	2.46	2.60X10-8	UP
CXCL2	2.57	4.91X10-6	UP	2.23	3.86X10-5	UP
CORO1A	2.41	1.74X10-5	UP	1.62	3.75X10-6	UP
FCRLA	2.35	1.03X10-3	UP	2.1	2.84X10-3	UP
EBI2	2.33	1.42X10-5	UP	1.6	4.20X10-6	UP
OSM	2.29	4.07X10-5	UP	1.84	5.74X10-5	UP
HLA-DQB1	2.29	2.37X10-4	UP	1.55	2.10X10-2	UP
CCR7	2.22	1.12X10-3	UP	2.87	3.84X10-7	UP
PTPRCAP	2.21	7.22X10-3	UP	2.07	5.47X10-5	UP
FAIM3	2.19	5.19X10-3	UP	2.51	1.37X10-6	UP
CD79A	2.19	9.88X10-3	UP	3.05	1.39X10-6	UP
WAS	2.18	4.67X10-5	UP	1.8	5.24X10-11	UP
C4orf7	2.16	7.99X10-3	UP	2.28	3.66X10-3	UP
EGR2	2.15	3.04X10-5	UP	2.35	2.12X10-8	UP
EVI2B	2.08	1.22X10-5	UP	1.55468	4.19X10-4	UP
TBC1D10C	2.06	1.24X10-3	UP	2.11	3.85X10-7	UP
CEMIP	2.01	5.84X10-3	UP	2.1	9.34X10-4	UP
SEMA4A	1.99	2.07X10-6	UP	2.4	8.88X10-10	UP
ARHGAP30	1.99	1.27X10-8	UP	1.7	9.49X10-8	UP
SEMA4D	1.95	1.01X10-5	UP	1.53	8.31X10-7	UP
CD2	1.94	1.19X10-3	UP	1.85	5.32X10-7	UP
G0S2	1.94	7.76X10-3	UP	1.99	2.33X10-4	UP
ICAM3	1.92	2.41X10-3	UP	1.53	1.05X10-6	UP
CXCR4	1.83	8.72X10-5	UP	2.11	6.34X10-6	UP
SELL	1.83	7.42X10-3	UP	3.01	3.94X10-9	UP
CD19	1.81	1.68X10-2	UP	2.97	4.02X10-5	UP
PIM2	1.78	2.75X10-3	UP	2.44	1.74X10-6	UP
PRDM1	1.78	2.04X10-6	UP	1.75	1.09X10-6	UP
LIME1	1.75	1.57X10-3	UP	1.51	6.00X10-6	UP
NFKBIZ	1.74	1.13X10-3	UP	1.64	5.44X10-9	UP
ISG20	1.74	9.65X10-4	UP	1.64	8.60X10-7	UP
IL10RA	1.73	6.09X10-6	UP	1.66	1.89X10-6	UP
BLK	1.68	9.27X10-3	UP	1.59	4.38X10-3	UP
CXCL13	1.68	6.57X10-3	UP	2.28	8.91X10-4	UP
SPOCK2	1.65	3.40X10-3	UP	2.4	3.38X10-10	UP
GBP5	1.63	3.95X10-6	UP	1.69	9.94X10-7	UP
PLAC8	1.63	2.20X10-3	UP	1.87	1.01X10-4	UP
VPREB3	1.62	1.90X10-2	UP	2.41	6.82X10-4	UP
IER3	1.6	1.77X10-2	UP	1.61	1.07X10-4	UP
BCL11A	1.6	1.57X10-3	UP	2.74	4.65X10-8	UP
ITK	1.6	9.22X10-3	UP	2.24	2.30X10-7	UP
BANK1	1.59	2.35X10-2	UP	2.06	1.36X10-3	UP
ACAP1	1.58	6.11X10-3	UP	1.82	2.84X10-6	UP
CD3D	1.55	1.55X10-2	UP	1.91	8.02X10-5	UP
CD8A	1.52	3.53X10-3	UP	1.66	1.09X10-4	UP
P2RY8	1.5	3.26X10-3	UP	2.3	4.57X10-9	UP
SBSPON	-1.52	1.16X10-2	DOWN	-2.11	7.05X10-5	DOWN
ALDH1B1	-1.56	1.31X10-4	DOWN	-1.84	2.53X10-4	DOWN
PDGFA	-1.57	3.49X10-3	DOWN	-2.07	6.31X10-10	DOWN
FIBIN	-1.6	1.41X10-6	DOWN	-2.08	3.57X10-9	DOWN
TIMP4	-1.62	6.43X10-3	DOWN	-3.14	1.99X10-9	DOWN
MRVI1	-1.63	1.95X10-3	DOWN	-1.71	1.64X10-7	DOWN
ACADL	-1.65	5.66X10-6	DOWN	-2.31	3.84X10-12	DOWN
PRRX2	-1.7	9.30X10-4	DOWN	-1.75	2.08X10-11	DOWN
FXYD1	-1.74	2.66X10-2	DOWN	-1.55	1.18X10-4	DOWN
STK38L	-1.75	1.54X10-6	DOWN	-1.67	1.55X10-5	DOWN
DACT3	-1.76	1.26X10-4	DOWN	-2.22	1.15X10-6	DOWN
SHRM	-1.77	6.52X10-5	DOWN	-1.9	1.96X10-4	DOWN
FGF13	-1.78	4.72X10-6	DOWN	-1.7	6.14X10-6	DOWN
HSPB2	-1.79	8.40X10-4	DOWN	-1.61	8.93X10-7	DOWN
GLDN	-1.84	6.02X10-5	DOWN	-2.34	4.92X10-6	DOWN
TGFB1I1	-1.85	3.44X10-3	DOWN	-1.81	1.52X10-7	DOWN
FAM46B	-1.87	3.54X10-6	DOWN	-3.08	1.34X10-9	DOWN
CKMT2	-1.91	5.49X10-5	DOWN	-1.62	4.42X10-6	DOWN
MAP1B	-1.93	3.59X10-4	DOWN	-2.4	2.18X10-6	DOWN
NPTX2	-1.96	1.02X10-4	DOWN	-2.58	2.57X10-9	DOWN
ZNF385D	-1.96	5.38X10-4	DOWN	-1.83	2.61X10-8	DOWN
PDE8B	-2.01	1.42X10-7	DOWN	-3.02	9.84X10-14	DOWN
HSPB8	-2.04	6.58X10-4	DOWN	-1.55	3.01X10-4	DOWN
MT1X	-2.09	8.04X10-3	DOWN	-3.26	7.74X10-9	DOWN
DUSP26	-2.1	8.79X10-6	DOWN	-2.46	6.91X10-13	DOWN
LOC401093	-2.11	1.04X10-3	DOWN	-1.8	2.26X10-4	DOWN
AOC3	-2.17	1.13X10-4	DOWN	-1.91	3.22X10-5	DOWN
NFIA	-2.21	5.61X10-5	DOWN	-1.57	4.38X10-4	DOWN
NEXN	-2.22	8.59X10-5	DOWN	-1.91	1.32X10-6	DOWN
SOST	-2.28	4.18X10-4	DOWN	-1.72	2.15X10-5	DOWN
ATOH8	-2.31	1.50X10-5	DOWN	-1.98	1.44X10-6	DOWN
KCNMB1	-2.34	4.09X10-4	DOWN	-1.71	2.93X10-4	DOWN
FBXO32	-2.34	7.42X10-5	DOWN	-1.72	7.09X10-8	DOWN
SLC25A4	-2.35	4.87X10-4	DOWN	-1.79	3.21X10-8	DOWN
GPRC5C	-2.35	9.58X10-6	DOWN	-2.22	4.38X10-10	DOWN
KCNAB1	-2.38	7.63X10-6	DOWN	-1.83	6.40X10-4	DOWN
CSRP2	-2.4	2.20X10-4	DOWN	-1.64	1.69X10-4	DOWN
IL13RA2	-2.44	2.52X10-8	DOWN	-2.21	2.35X10-7	DOWN
FHL5	-2.46	1.99X10-5	DOWN	-2.73	7.12X10-8	DOWN
ZBTB16	-2.48	3.08X10-4	DOWN	-3.26	3.85X10-11	DOWN
LMO3	-2.5	2.96X10-5	DOWN	-1.51	2.59X10-3	DOWN
APEG1	-2.58	8.01X10-6	DOWN	-1.93	9.58X10-7	DOWN
PRUNE2	-2.61	2.83X10-8	DOWN	-1.85	2.63X10-4	DOWN
PPP1R14A	-2.63	8.02X10-5	DOWN	-2.02	7.10X10-7	DOWN
SYNPO2	-2.65	1.08X10-5	DOWN	-1.61	7.36X10-4	DOWN
SCRG1	-2.68	2.47X10-4	DOWN	-2.27	7.89X10-5	DOWN
CNN1	-2.77	3.56X10-3	DOWN	-2.19	6.76X10-4	DOWN
PCDH7	-2.8	5.29X10-7	DOWN	-1.72	9.43X10-7	DOWN
RASL12	-2.85	2.80X10-4	DOWN	-2.32	1.31X10-6	DOWN
LMOD1	-2.86	3.06X10-5	DOWN	-1.82	1.20X10-3	DOWN
HSPB7	-2.92	1.12X10-5	DOWN	-3.28	1.53X10-8	DOWN
ACTC1	-2.95	5.81X10-6	DOWN	-3.77	2.35X10-7	DOWN
MAOA	-2.95	6.18X10-6	DOWN	-1.64	4.21X10-4	DOWN
IGFBP2	-2.97	7.43X10-5	DOWN	-2.38	5.99X10-7	DOWN
CRYAB	-2.98	3.65X10-4	DOWN	-1.59	4.81X10-5	DOWN
LDOC1	-2.98	1.93X10-4	DOWN	-1.68	7.87X10-5	DOWN
RAMP1	-2.99	8.78X10-7	DOWN	-2.84	2.01X10-9	DOWN
FLJ21986	-2.99	5.18X10-6	DOWN	-1.75	2.80X10-4	DOWN
TMEM47	-3.01	5.80X10-5	DOWN	-1.69	1.05X10-4	DOWN
MYL9	-3.08	7.76X10-4	DOWN	-1.57	5.18X10-5	DOWN
SORBS1	-3.16	1.36X10-4	DOWN	-1.58	9.31X10-4	DOWN
RCAN2	-3.16	2.39X10-5	DOWN	-1.82	1.45X10-4	DOWN
NOV	-3.26	7.95X10-6	DOWN	-1.86	8.59X10-4	DOWN
PLN	-3.28	3.06X10-7	DOWN	-2.86	2.94X10-7	DOWN
KCNA5	-3.29	3.70X10-8	DOWN	-2.21	9.37X10-7	DOWN
EFHD1	-3.38	6.23X10-6	DOWN	-1.84	1.94X10-5	DOWN
RGS5	-3.42	1.30X10-6	DOWN	-1.86	3.22X10-4	DOWN
FRZB	-3.49	4.33X10-6	DOWN	-2.04	3.85X10-6	DOWN
C6orf117	-3.66	5.03X10-10	DOWN	-3.2	3.28X10-8	DOWN
ITGA8	-3.67	5.82X10-8	DOWN	-4.4	2.62X10-10	DOWN
ADH1B	-3.67	1.14X10-4	DOWN	-1.67	3.78X10-4	DOWN
TCEAL2	-3.78	4.44X10-12	DOWN	-2.93	5.29X10-8	DOWN
PPP1R3C	-4.2	7.45X10-8	DOWN	-2.19	8.40X10-5	DOWN
